# Supplementary material for: Study on formation mechanism and ligand-directed architectural control of nanoparticles composed of Bi, Sb and Te: towards one-pot synthesis of ternary (Bi,Sb)2Te3 nanobuilding blocks
Source: Royal Society of Chemistry journal article supplement (doi:10.1039/c1ra00069a), 2011-01-01
Supplement: c1ra00069a.pdf [file c1ra00069a.pdf]

# Supplementary Information

for

## Study on Formation Mechanism and Ligand-directed Architectural Control of Nanoparticles Composed of Bi, Sb and Te: Toward One-pot Synthesis of Ternary (Bi,Sb)<sub>2</sub>Te<sub>3</sub> Nanobuilding Blocks

*Nguyen T. Mai, Derrick Mott, Nguyen T. B. Thuy, Issey Osaka and Shinya Maenosono*

School of Materials Science, Japan Advanced Institute of Science and Technology, 1-1 Asahidai, Nomi, Ishikawa  
923-1292, Japan

### Table of Contents

|                                                                                                                                                                                 |           |
|---------------------------------------------------------------------------------------------------------------------------------------------------------------------------------|-----------|
| <b>1. XRD Peak Assignments</b> .....                                                                                                                                            | <b>2</b>  |
| 1.1. Monometallic Systems .....                                                                                                                                                 | 2         |
| 1.1.1. Bi monometallic systems .....                                                                                                                                            | 2         |
| 1.1.2. Sb monometallic systems .....                                                                                                                                            | 3         |
| 1.1.3. Te monometallic systems .....                                                                                                                                            | 4         |
| 1.2. Bimetallic Systems .....                                                                                                                                                   | 5         |
| 1.2.1. Bi-Sb bimetallic systems .....                                                                                                                                           | 5         |
| 1.2.2. Bi-Te bimetallic systems .....                                                                                                                                           | 6         |
| 1.2.3. Sb-Te bimetallic systems .....                                                                                                                                           | 7         |
| 1.3. Trimetallic System .....                                                                                                                                                   | 8         |
| <b>2. Monometallic Synthesis of Sb and Te NWs using OAM or OAC/OAM</b> .....                                                                                                    | <b>9</b>  |
| <b>3. Photographs of Metal-Ligand Complexes</b> .....                                                                                                                           | <b>10</b> |
| <b>4. FTICR-MS Spectrum of Sb-DT Complex</b> .....                                                                                                                              | <b>10</b> |
| <b>5. TGA Data of Sb-DT Complex</b> .....                                                                                                                                       | <b>11</b> |
| <b>6. HRTEM Image of Bi<sub>70</sub>Sb<sub>30</sub> Alloy NPs</b> .....                                                                                                         | <b>12</b> |
| <b>7. Relationship between Lattice Spacing and Composition of BiSb Alloy</b> .....                                                                                              | <b>13</b> |
| <b>8. Comparison of XRD Peak Position Collected for Resulting NPs Synthesized using BiCl<sub>3</sub> and BiCl<sub>3</sub>/SbCl<sub>3</sub> with DT as Capping Ligands</b> ..... | <b>13</b> |
| <b>9. Bimetallic Synthesis of Bi-Te Halide Precursors and DT</b> .....                                                                                                          | <b>14</b> |
| <b>10. HRTEM Images of a Single Bi-Sb-Te NW Synthesized using OAM</b> .....                                                                                                     | <b>14</b> |
| <b>11. Results for Trimetallic Approach using Oleic Acid as Capping System</b> .....                                                                                            | <b>15</b> |

## 1. XRD Peak Assignments

### 1.1. Monometallic Systems

#### 1.1.1. Bi monometallic systems

**Table S1.** XRD peak positions and corresponding crystal planes for Fig. 1A (Bi-OAM system).

| 2 Theta (Degree) | Intensity | Phase       | ( <i>h k l</i> ) |
|------------------|-----------|-------------|------------------|
| 22.42            | Very weak | Bi (RHO)    | (0 0 3)          |
| 24.16            | Strong    | BiOCl (TET) | (0 0 2)          |
| 25.88            | Medium    | BiOCl (TET) | (1 0 1)          |
| 27.15            | Medium    | Bi (RHO)    | (0 1 2)          |
| 32.48            | Strong    | BiOCl (TET) | (1 1 0)          |
| 33.44            | Strong    | BiOCl (TET) | (1 0 2)          |
| 34.73            | Very weak | BiOCl (TET) | (1 1 1)          |
| 36.56            | Medium    | BiOCl (TET) | (0 0 3)          |
| 38.01            | Weak      | Bi (RHO)    | (1 0 4)          |
| 39.70            | Weak      | Bi (RHO)    | (1 1 0)          |
| 40.89            | Weak      | BiOCl (TET) | (1 1 2)          |
| 44.53            | Very weak | Bi (RHO)    | (0 1 5)          |
| 45.93            | Very weak | Bi (RHO)    | (0 0 6)          |
| 46.60            | Weak      | BiOCl (TET) | (2 0 0)          |
| 48.36            | Very weak | BiOCl (TET) | (2 0 1)          |
| 48.76            | Very weak | Bi (RHO)    | (2 0 2)          |
| 49.62            | Weak      | BiOCl (TET) | (1 1 3)          |
| 53.06            | Very weak | BiOCl (TET) | (2 0 2)          |
| 54.04            | Weak      | BiOCl (TET) | (2 1 1)          |
| 55.14            | Weak      | BiOCl (TET) | (1 0 4)          |
| 58.56            | Weak      | BiOCl (TET) | (2 1 2)          |

RHO=Rhombohedral, TET=Tetragonal

**Table S2.** XRD peak positions and corresponding crystal planes for Fig. 1B (Bi-OAC/OAM system).

| 2 Theta (Degree) | Intensity | Phase       | ( <i>h k l</i> ) |
|------------------|-----------|-------------|------------------|
| 24.10            | Strong    | BiOCl (TET) | (0 0 2)          |
| 25.78            | Weak      | BiOCl (TET) | (1 0 1)          |
| 27.16            | Weak      | Bi (RHO)    | (0 1 2)          |
| 32.50            | Medium    | BiOCl (TET) | (1 1 0)          |
| 33.40            | Medium    | BiOCl (TET) | (1 0 2)          |
| 34.76            | Very weak | BiOCl (TET) | (1 1 1)          |
| 36.54            | Strong    | BiOCl (TET) | (0 0 3)          |
| 37.96            | Weak      | Bi (RHO)    | (1 0 4)          |
| 39.54            | Weak      | Bi (RHO)    | (1 1 0)          |
| 40.88            | Weak      | BiOCl (TET) | (1 1 2)          |
| 44.60            | Very weak | Bi (RHO)    | (0 1 5)          |
| 45.90            | Very weak | Bi (RHO)    | (0 0 6)          |
| 46.60            | Weak      | BiOCl (TET) | (2 0 0)          |
| 48.34            | Very weak | BiOCl (TET) | (2 0 1)          |
| 49.56            | Weak      | BiOCl (TET) | (1 1 3)          |
| 53.16            | Very weak | BiOCl (TET) | (2 0 2)          |
| 54.10            | Weak      | BiOCl (TET) | (2 1 1)          |
| 55.02            | Weak      | BiOCl (TET) | (1 0 4)          |
| 58.56            | Weak      | BiOCl (TET) | (2 1 2)          |

RHO=Rhombohedral, TET=Tetragonal

**Table S3.** XRD peak positions and corresponding crystal planes for Fig. 1C (Bi-DT system).

| <b>2 Theta (Degree)</b> | <b>Intensity</b> | <b>Phase</b> | <b>(h k l)</b> |
|-------------------------|------------------|--------------|----------------|
| 22.44                   | Very weak        | Bi (RHO)     | (0 0 3)        |
| 23.81                   | Very weak        | Bi (RHO)     | (1 0 1)        |
| 27.12                   | Strong           | Bi (RHO)     | (0 1 2)        |
| 37.92                   | Medium           | Bi (RHO)     | (1 0 4)        |
| 39.59                   | Medium           | Bi (RHO)     | (1 1 0)        |
| 44.53                   | Very weak        | Bi (RHO)     | (0 1 5)        |
| 45.95                   | Very weak        | Bi (RHO)     | (0 0 6)        |
| 46.89                   | Very weak        | Bi (RHO)     | (0 2 1)        |
| 48.66                   | Weak             | Bi (RHO)     | (2 0 2)        |
| 55.97                   | Very weak        | Bi (RHO)     | (0 2 4)        |
| 59.29                   | Very weak        | Bi (RHO)     | (1 0 7)        |

RHO=Rhombohedral

### 1.1.2. Sb monometallic systems

**Table S4.** XRD peak positions and corresponding crystal planes for Fig. 2A (Sb-OAM system).

| <b>2 Theta (Degree)</b> | <b>Intensity</b> | <b>Phase</b> | <b>(h k l)</b> |
|-------------------------|------------------|--------------|----------------|
| 23.66                   | Very weak        | Sb (RHO)     | (0 0 3)        |
| 28.65                   | Strong           | Sb (RHO)     | (0 1 2)        |
| 39.98                   | Weak             | Sb (RHO)     | (1 0 4)        |
| 41.88                   | Weak             | Sb (RHO)     | (1 1 0)        |
| 46.98                   | Very weak        | Sb (RHO)     | (0 1 5)        |
| 48.41                   | Very weak        | Sb (RHO)     | (0 0 6)        |
| 51.54                   | Very weak        | Sb (RHO)     | (2 0 2)        |
| 59.39                   | Very weak        | Sb (RHO)     | (0 2 4)        |

RHO=Rhombohedral

**Table S5.** XRD peak positions and corresponding crystal planes for Fig. 2B (Sb-OAC/OAM system).

| <b>2 Theta (Degree)</b> | <b>Intensity</b> | <b>Phase</b> | <b>(h k l)</b> |
|-------------------------|------------------|--------------|----------------|
| 23.64                   | Very weak        | Sb (RHO)     | (0 0 3)        |
| 28.62                   | Strong           | Sb (RHO)     | (0 1 2)        |
| 40.00                   | Medium           | Sb (RHO)     | (1 0 4)        |
| 41.91                   | Medium           | Sb (RHO)     | (1 1 0)        |
| 47.09                   | Very weak        | Sb (RHO)     | (0 1 5)        |
| 48.35                   | Very weak        | Sb (RHO)     | (0 0 6)        |
| 51.50                   | Weak             | Sb (RHO)     | (2 0 2)        |
| 59.33                   | Very weak        | Sb (RHO)     | (0 2 4)        |

RHO=Rhombohedral

### 1.1.3. Te monometallic systems

**Table S6.** XRD peak positions and corresponding crystal planes for Fig. 3A (Te-OAM system).

| 2 Theta (Degree) | Intensity | Phase    | (h k l) |
|------------------|-----------|----------|---------|
| 23.00            | Weak      | Te (HEX) | (1 0 0) |
| 27.52            | Strong    | Te (HEX) | (1 0 1) |
| 38.22            | Medium    | Te (HEX) | (1 0 2) |
| 40.41            | Medium    | Te (HEX) | (1 1 0) |
| 43.36            | Very weak | Te (HEX) | (1 1 1) |
| 45.97            | Very weak | Te (HEX) | (0 0 3) |
| 47.12            | Very weak | Te (HEX) | (2 0 0) |
| 49.62            | Weak      | Te (HEX) | (2 0 1) |
| 51.22            | Very weak | Te (HEX) | (1 1 2) |
| 51.93            | Very weak | Te (HEX) | (1 0 3) |
| 56.83            | Very weak | Te (HEX) | (2 0 2) |

HEX=Hexagonal

**Table S7.** XRD peak positions and corresponding crystal planes for Fig. 3B (Te-OAC/OAM system).

| 2 Theta (Degree) | Intensity | Phase    | (h k l) |
|------------------|-----------|----------|---------|
| 23.00            | Weak      | Te (HEX) | (1 0 0) |
| 27.52            | Strong    | Te (HEX) | (1 0 1) |
| 38.24            | Weak      | Te (HEX) | (1 0 2) |
| 40.42            | Weak      | Te (HEX) | (1 1 0) |
| 43.36            | Very weak | Te (HEX) | (1 1 1) |
| 45.88            | Very weak | Te (HEX) | (0 0 3) |
| 47.12            | Very weak | Te (HEX) | (2 0 0) |
| 49.62            | Very weak | Te (HEX) | (2 0 1) |
| 51.24            | Very weak | Te (HEX) | (1 1 2) |
| 52.04            | Very weak | Te (HEX) | (1 0 3) |
| 56.84            | Very weak | Te (HEX) | (2 0 2) |

HEX=Hexagonal

**Table S8.** XRD peak positions and corresponding crystal planes for Fig. 3C (Te-DT system).

| 2 Theta (Degree) | Intensity | Phase    | (h k l) |
|------------------|-----------|----------|---------|
| 23.00            | Weak      | Te (HEX) | (1 0 0) |
| 27.54            | Strong    | Te (HEX) | (1 0 1) |
| 38.24            | Medium    | Te (HEX) | (1 0 2) |
| 40.46            | Weak      | Te (HEX) | (1 1 0) |
| 43.42            | Very weak | Te (HEX) | (1 1 1) |
| 46.04            | Very weak | Te (HEX) | (0 0 3) |
| 47.16            | Very weak | Te (HEX) | (2 0 0) |
| 49.68            | Very weak | Te (HEX) | (2 0 1) |
| 51.24            | Very weak | Te (HEX) | (1 1 2) |
| 52.06            | Very weak | Te (HEX) | (1 0 3) |
| 56.88            | Very weak | Te (HEX) | (2 0 2) |

HEX=Hexagonal

## 1.2. Bimetallic Systems

### 1.2.1. Bi-Sb bimetallic systems

**Table S9.** XRD peak positions and corresponding crystal planes for Fig. 4A (Bi/Sb-OAM system).

| 2 Theta (Degree) | Intensity | Phase      | ( <i>h k l</i> ) |
|------------------|-----------|------------|------------------|
| 27.45            | Strong    | BiSb (RHO) | (0 1 2)          |
| 38.34            | Weak      | BiSb (RHO) | (1 0 4)          |
| 40.33            | Medium    | BiSb (RHO) | (1 1 0)          |
| 46.34            | Very weak | BiSb (RHO) | (0 1 5)          |
| 49.44            | Very weak | BiSb (RHO) | (2 0 2)          |
| 56.78            | Very weak | BiSb (RHO) | (0 2 4)          |

RHO=Rhombohedral

**Table S10.** XRD peak positions and corresponding crystal planes for Fig. 4B (Bi/Sb-OAC/OAM system).

| 2 Theta (Degree) | Intensity | Phase      | ( <i>h k l</i> ) |
|------------------|-----------|------------|------------------|
| 22.54            | Very weak | BiSb (RHO) | (0 0 3)          |
| 27.28            | Strong    | BiSb (RHO) | (0 1 2)          |
| 38.14            | Weak      | BiSb (RHO) | (1 0 4)          |
| 39.78            | Medium    | BiSb (RHO) | (1 1 0)          |
| 44.78            | Very weak | Bi (RHO)   | (0 1 5)          |
| 46.12            | Very weak | BiSb (RHO) | (0 1 5)          |
| 48.96            | Very weak | BiSb (RHO) | (2 0 2)          |
| 56.28            | Very weak | BiSb (RHO) | (0 2 4)          |

RHO=Rhombohedral

**Table S11.** XRD peak positions and corresponding crystal planes for Fig. 4C (Bi/Sb-DT system).

| 2 Theta (Degree) | Intensity | Phase    | ( <i>h k l</i> ) |
|------------------|-----------|----------|------------------|
| 22.32            | Weak      | Bi (RHO) | (0 0 3)          |
| 23.60            | Very weak | Bi (RHO) | (1 0 1)          |
| 27.14            | Strong    | Bi (RHO) | (0 1 2)          |
| 37.92            | Medium    | Bi (RHO) | (1 0 4)          |
| 39.60            | Medium    | Bi (RHO) | (1 1 0)          |
| 44.56            | Very weak | Bi (RHO) | (0 1 5)          |
| 45.18            | Very weak | Bi (RHO) | (0 0 6)          |
| 45.90            | Very weak | Bi (RHO) | (1 1 3)          |
| 46.74            | Very weak | Bi (RHO) | (0 2 1)          |
| 48.66            | Very weak | Bi (RHO) | (2 0 2)          |
| 56.02            | Very weak | Bi (RHO) | (0 2 4)          |
| 59.30            | Very weak | Bi (RHO) | (1 0 7)          |

RHO=Rhombohedral

### 1.2.2. Bi-Te bimetallic systems

**Table S12.** XRD peak positions and corresponding crystal planes for Fig. 5A (Bi/Te-OAM system).

| 2 Theta (Degree) | Intensity | Phase    | (h k l) |
|------------------|-----------|----------|---------|
| 23.01            | Weak      | Te (HEX) | (1 0 0) |
| 27.56            | Strong    | Te (HEX) | (1 0 1) |
| 38.31            | Very weak | Te (HEX) | (1 0 2) |
| 40.34            | Medium    | Te (HEX) | (1 1 0) |
| 43.36            | Very weak | Te (HEX) | (1 1 1) |
| 45.88            | Very weak | Te (HEX) | (0 0 3) |
| 47.02            | Very weak | Te (HEX) | (2 0 0) |
| 49.57            | Weak      | Te (HEX) | (2 0 1) |
| 51.42            | Very weak | Te (HEX) | (1 1 2) |
| 56.91            | Very weak | Te (HEX) | (2 0 2) |

HEX=Hexagonal

**Table S13.** XRD peak positions and corresponding crystal planes for Fig. 5B (Bi/Te-OAC/OAM system).

| 2 Theta (Degree) | Intensity | Phase    | (h k l) |
|------------------|-----------|----------|---------|
| 23.02            | Weak      | Te (HEX) | (1 0 0) |
| 27.54            | Strong    | Te (HEX) | (1 0 1) |
| 38.28            | Weak      | Te (HEX) | (1 0 2) |
| 40.40            | Weak      | Te (HEX) | (1 1 0) |
| 43.38            | Very weak | Te (HEX) | (1 1 1) |
| 45.98            | Very weak | Te (HEX) | (0 0 3) |
| 47.16            | Very weak | Te (HEX) | (2 0 0) |
| 49.62            | Weak      | Te (HEX) | (2 0 1) |
| 51.26            | Very weak | Te (HEX) | (1 1 2) |
| 52.08            | Very weak | Te (HEX) | (1 0 3) |
| 56.86            | Very weak | Te (HEX) | (2 0 2) |

HEX=Hexagonal

**Table S14.** XRD peak positions and corresponding crystal planes for Fig. 5C (Bi/Te-DT system).

| 2 Theta (Degree) | Intensity | Phase                                 | (h k l)  |
|------------------|-----------|---------------------------------------|----------|
| 23.60            | Very weak | Bi <sub>2</sub> Te <sub>3</sub> (RHO) | (1 0 1)  |
| 27.62            | Strong    | Bi <sub>2</sub> Te <sub>3</sub> (RHO) | (0 1 5)  |
| 37.96            | Weak      | Bi <sub>2</sub> Te <sub>3</sub> (RHO) | (1 0 10) |
| 40.38            | Very weak | Bi <sub>2</sub> Te <sub>3</sub> (RHO) | (0 1 11) |
| 41.16            | Weak      | Bi <sub>2</sub> Te <sub>3</sub> (RHO) | (1 1 0)  |
| 44.68            | Very weak | Bi <sub>2</sub> Te <sub>3</sub> (RHO) | (0 0 15) |
| 45.00            | Very weak | Bi <sub>2</sub> Te <sub>3</sub> (RHO) | (1 1 6)  |
| 50.32            | Very weak | Bi <sub>2</sub> Te <sub>3</sub> (RHO) | (2 0 5)  |
| 54.02            | Very weak | Bi <sub>2</sub> Te <sub>3</sub> (RHO) | (0 0 18) |
| 57.18            | Very weak | Bi <sub>2</sub> Te <sub>3</sub> (RHO) | (0 2 10) |

RHO=Rhombohedral

### 1.2.3. Sb-Te bimetallic systems

**Table S15.** XRD peak positions and corresponding crystal planes for Fig. 6A (Sb/Te-OAM system).

| 2 Theta (Degree) | Intensity | Phase    | (h k l) |
|------------------|-----------|----------|---------|
| 22.94            | Weak      | Te (HEX) | (1 0 0) |
| 27.43            | Strong    | Te (HEX) | (1 0 1) |
| 38.15            | Weak      | Te (HEX) | (1 0 2) |
| 40.37            | Strong    | Te (HEX) | (1 1 0) |
| 43.18            | Weak      | Te (HEX) | (1 1 1) |
| 45.87            | Very weak | Te (HEX) | (0 0 3) |
| 47.02            | Very weak | Te (HEX) | (2 0 0) |
| 49.49            | Medium    | Te (HEX) | (2 0 1) |
| 51.22            | Very weak | Te (HEX) | (1 1 2) |
| 51.93            | Very weak | Te (HEX) | (1 0 3) |
| 56.72            | Weak      | Te (HEX) | (2 0 2) |

HEX=Hexagonal

**Table S16.** XRD peak positions and corresponding crystal planes for Fig. 6B (Sb/Te-OAC/OAM system).

| 2 Theta (Degree) | Intensity | Phase    | (h k l) |
|------------------|-----------|----------|---------|
| 23.00            | Weak      | Te (HEX) | (1 0 0) |
| 27.54            | Strong    | Te (HEX) | (1 0 1) |
| 38.26            | Weak      | Te (HEX) | (1 0 2) |
| 40.42            | Medium    | Te (HEX) | (1 1 0) |
| 43.34            | Very weak | Te (HEX) | (1 1 1) |
| 45.88            | Very weak | Te (HEX) | (0 0 3) |
| 47.06            | Very weak | Te (HEX) | (2 0 0) |
| 49.62            | Weak      | Te (HEX) | (2 0 1) |
| 51.24            | Very weak | Te (HEX) | (1 1 2) |
| 52.04            | Very weak | Te (HEX) | (1 0 3) |
| 56.86            | Very weak | Te (HEX) | (2 0 2) |

HEX=Hexagonal

**Table S17.** XRD peak positions and corresponding crystal planes for Fig. 6C (Sb/Te-DT system).

| 2 Theta (Degree) | Intensity | Phase                                           | (h k l)           |
|------------------|-----------|-------------------------------------------------|-------------------|
| 23.00            | Very weak | Te (HEX)                                        | (1 0 0)           |
| 26.32            | Very weak | Sb <sub>2</sub> Te <sub>3</sub> (RHO)           | (0 0 9)           |
| 26.80            | Very weak | Sb <sub>2</sub> Te <sub>3</sub> (RHO)           | (1 0 4)           |
| 27.54            | Weak      | Te (HEX)                                        | (1 0 1)           |
| 28.20            | Strong    | Sb <sub>2</sub> Te <sub>3</sub> (RHO)           | (0 1 5)           |
| 31.70            | Very weak | Sb <sub>2</sub> Te <sub>3</sub> (RHO)           | (1 0 7)           |
| 33.80            | Very weak | Sb <sub>2</sub> Te <sub>3</sub> (RHO)           | (0 1 8)           |
| 38.26            | Medium    | Sb <sub>2</sub> Te <sub>3</sub> (RHO), Te (HEX) | (1 0 10), (1 0 2) |
| 40.42            | Very weak | Te (HEX)                                        | (1 1 0)           |
| 40.70            | Very weak | Sb <sub>2</sub> Te <sub>3</sub> (RHO)           | (0 1 11)          |
| 42.30            | Weak      | Sb <sub>2</sub> Te <sub>3</sub> (RHO)           | (1 1 0)           |
| 43.32            | Very weak | Te (HEX)                                        | (1 1 1)           |
| 44.58            | Very weak | Sb <sub>2</sub> Te <sub>3</sub> (RHO)           | (0 0 15)          |
| 45.94            | Very weak | Sb <sub>2</sub> Te <sub>3</sub> (RHO), Te (HEX) | (1 0 13), (0 0 3) |
| 48.54            | Very weak | Sb <sub>2</sub> Te <sub>3</sub> (RHO)           | (0 1 14)          |
| 49.60            | Very weak | Te (HEX)                                        | (2 0 1)           |
| 50.56            | Very weak | Sb <sub>2</sub> Te <sub>3</sub> (RHO)           | (1 1 9)           |
| 51.64            | Very weak | Sb <sub>2</sub> Te <sub>3</sub> (RHO)           | (2 0 5)           |
| 54.20            | Very weak | Sb <sub>2</sub> Te <sub>3</sub> (RHO)           | (0 0 18)          |
| 56.86            | Very weak | Sb <sub>2</sub> Te <sub>3</sub> (RHO), Te (HEX) | (0 1 17), (2 0 2) |
| 58.36            | Very weak | Sb <sub>2</sub> Te <sub>3</sub> (RHO)           | (0 2 10)          |

HEX=Hexagonal, RHO=Rhombohedral

### 1.3. Trimetallic System

**Table S18.** XRD peak positions and corresponding crystal planes for Fig. 8 (Bi/Sb/Te-OAM system).

| <b>2 Theta (Degree)</b> | <b>Intensity</b> | <b>Phase</b>           | <b>(h k l)</b>   |
|-------------------------|------------------|------------------------|------------------|
| 22.98                   | Very weak        | Te (HEX)               | (1 0 0)          |
| 23.56                   | Very weak        | BiSbTe (RHO)           | (1 0 1)          |
| 27.59                   | Strong           | Te (HEX), BiSbTe (RHO) | (1 0 1), (0 1 5) |
| 33.27                   | Very weak        | BiSbTe (RHO)           | (0 1 8)          |
| 37.73                   | Medium           | BiSbTe (RHO)           | (1 0 10)         |
| 38.21                   | Weak             | Te (HEX)               | (1 0 2)          |
| 40.38                   | Weak             | Te (HEX)               | (1 1 0)          |
| 41.11                   | Medium           | BiSbTe (RHO)           | (1 1 0)          |
| 43.28                   | Very weak        | Te (HEX)               | (1 1 1)          |
| 44.46                   | Very weak        | BiSbTe (RHO)           | (0 0 15)         |
| 44.95                   | Very weak        | BiSbTe (RHO)           | (1 1 6)          |
| 45.44                   | Very weak        | BiSbTe (RHO)           | (1 0 13)         |
| 45.86                   | Very weak        | Te (HEX)               | (0 0 3)          |
| 49.55                   | Very weak        | Te (HEX)               | (2 0 1)          |
| 50.27                   | Weak             | BiSbTe (RHO)           | (2 0 5)          |
| 51.16                   | Very weak        | Te (HEX)               | (1 1 2)          |
| 51.92                   | Very weak        | Te (HEX)               | (1 0 3)          |
| 53.74                   | Very weak        | BiSbTe (RHO)           | (1 0 16)         |
| 56.84                   | Very weak        | Te (HEX)               | (2 0 2)          |
| 57.05                   | Weak             | BiSbTe (RHO)           | (0 2 10)         |
| 58.95                   | Very weak        | BiSbTe (RHO)           | (2 0 11)         |
| 62.17                   | Weak             | BiSbTe (RHO)           | (1 1 15)         |
| 62.76                   | Very weak        | BiSbTe (RHO)           | (0 2 13)         |
| 63.66                   | Very weak        | BiSbTe (RHO)           | (0 0 21)         |
| 65.90                   | Weak             | BiSbTe (RHO)           | (0 1 20)         |
| 66.88                   | Weak             | BiSbTe (RHO)           | (1 2 5)          |
| 67.65                   | Very weak        | Te (HEX)               | (1 0 4)          |
| 70.09                   | Very weak        | BiSbTe (RHO)           | (0 2 16)         |
| 72.08                   | Very weak        | Te (HEX)               | (2 1 2)          |
| 72.68                   | Weak             | BiSbTe (RHO)           | (2 1 10)         |
| 74.91                   | Very weak        | BiSbTe (RHO)           | (1 2 11)         |
| 77.87                   | Very weak        | Te (HEX)               | (1 1 4)          |
| 79.03                   | Very weak        | BiSbTe (RHO)           | (1 1 21)         |

HEX=Hexagonal, RHO=Rhombohedral



## 2. Monometallic Synthesis of Sb and Te NWs using OAM or OAC/OAM

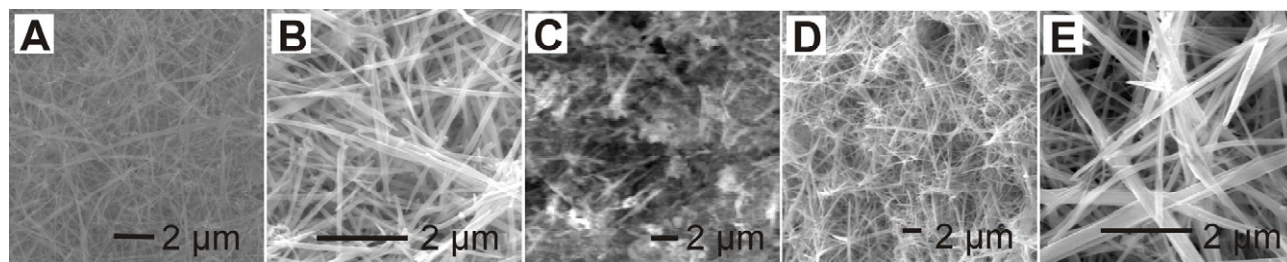

**Figure S1.** SEM images of (A and B) Sb NWs synthesized using OAM, (C) Sb NWs synthesized using OAC/OAM, and (D and E) Te NWs synthesized using OAM.

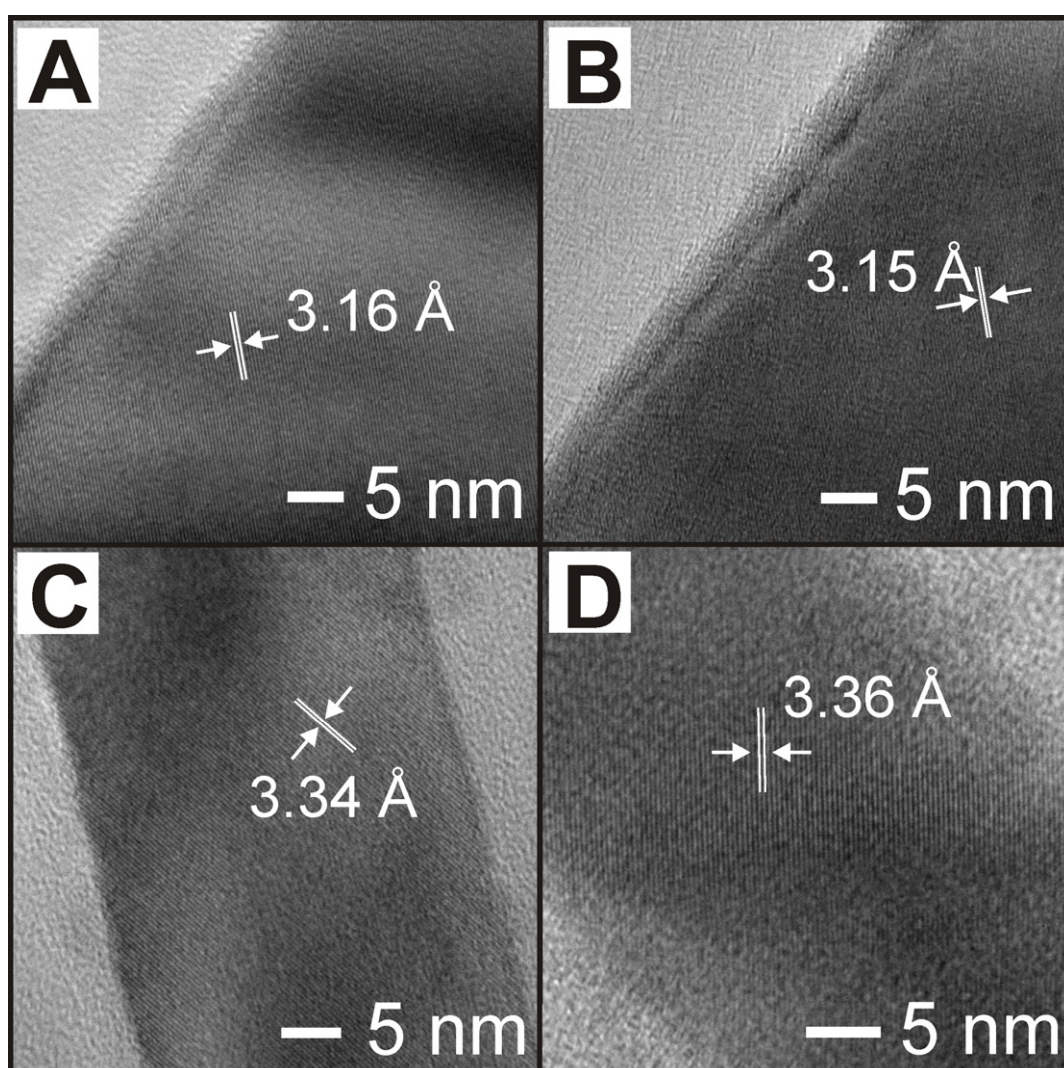

**Figure S2.** (A and B) HRTEM images of different parts of a single Sb NW synthesized using OAM. Lattice fringes indicated in the images correspond to the (012) plane of rhombohedral Sb. (C and D) HRTEM images of a single Te NW synthesized using OAM. Lattice fringes correspond to the (101) plane of hexagonal Te.

### 3. Photographs of Metal-Ligand Complexes

Each elemental precursor was dissolved in hexane solvent with a single capping ligand including OAM, OAC or DT under nitrogen atmosphere followed by stirring for 24 hours at room temperature. After that, a filter was used to separate the solid precursor from the liquid complex solution for analysis. The complexes of elemental precursors and each capping ligand have a different color as shown in Fig. S3.

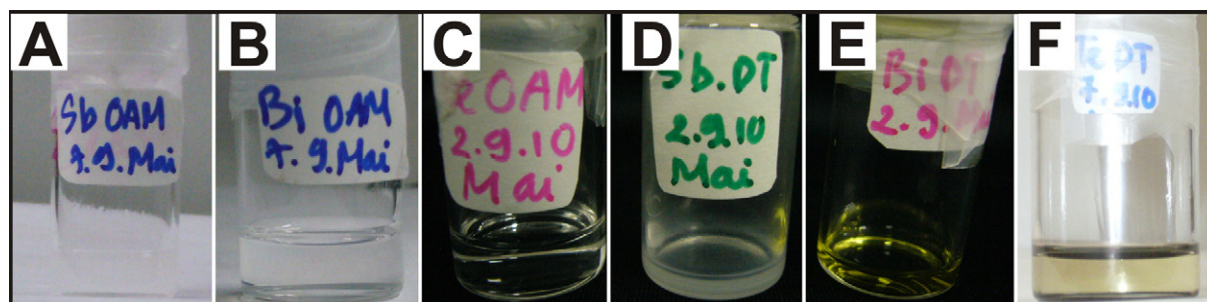

**Figure S3.** Photographs of single elemental complex solutions of Sb, Bi and Te with OAM and DT capping ligands. (A) Sb-OAM, (B) Bi-OAM, (C) Te-OAM, (D) Sb-DT, (E) Bi-DT and (F) Te-DT.

### 4. FTICR-MS Spectrum of Sb-DT Complex

To prove the existence of the metal-ligand complex, we conducted electrospray ionization Fourier transform ion cyclotron resonance mass spectroscopy (ESI-FTICR-MS) analysis for the Sb-DT complex. A Fourier transform ion cyclotron resonance mass spectrometer (FTICR-MS) equipped with a 9.4 T superconducting magnet (Solarix, Bruker Daltonics) was used for the analysis of the sample solutions. MS detection was performed in positive-ion ESI mode. Since Sb-DT complexes are thought to be relatively stable and Sb(III) shows specific isotope patterns ( $^{121}\text{Sb}$ : $^{123}\text{Sb}$ ; 57:43), they can easily be recognized in the mass spectrum.

Figure S4 shows an averaged mass spectrum measured for the sample prepared by dissolving  $\text{SbCl}_3$  in DT at a concentration of  $1 \times 10^{-3}$  mM followed by dilution using 2-propanol. The spectrum shows various ions which are not observed for pure DT at an  $m/z$  range of 600-700. Two intense peaks are observed at  $m/z$  611.32091 and 647.29856.

First, we analyzed the peak at  $m/z$  611.32091 (Peak611) and its satellite peaks. The difference in  $m/z$  between the peak at  $m/z$  613.32102 (Peak613) and Peak611 exactly corresponds to the difference in accurate mass numbers of the stable isotopes of Sb. In addition, the intensity ratio between Peak611 and Peak613 is close to the isotope abundance ratio. The accurate mass obtained with the FTICR-MS supports the identification of Sb.

On the other hand, the difference in  $m/z$  between the peak at  $m/z$  612.32340 (or  $m/z$  614.32305) and Peak611 (or Peak613) exactly corresponds to the difference in accurate mass numbers of the stable isotopes of C ( $^{12}\text{C}=12$ ,  $^{13}\text{C}=13.00335484$ ). This result indicates that the ion has a molecular structure that contains carbon atoms. Consequently, we can conclude that Peak611 corresponds to a specific ion related to an Sb-DT complex, even though we couldn't identify its composition.

Therefore, the Peak611 is designated as  $[^{121}\text{Sb}_x\text{Y}]^+$  hereafter where Y represents a DT-derived organic ligand.

Next, the peak at  $m/z$  647.29856 (Peak647) and its satellite peaks are investigated. Again, the difference in  $m/z$  between Peak647 and the peak at  $m/z$  649.29791 (Peak649) exactly corresponds to the difference in accurate mass numbers of the stable isotopes of Sb. Also, the difference in  $m/z$  between the peak at  $m/z$  648.30152 (or  $m/z$  650.29976) and Peak647 (or Peak649) exactly corresponds to the difference in accurate mass numbers of the stable isotopes of C. Thus, we can conclude that Peak647 also corresponds to another ion related to an Sb-DT complex, which has a different ligand structure compared to  $[^{121}\text{Sb}_x\text{Y}]^+$ . Thus, the Peak647 is designated as  $[^{121}\text{Sb}_x\text{Z}]^+$  where Z represents a DT-derived organic ligand whose molecular structure differs from Y.

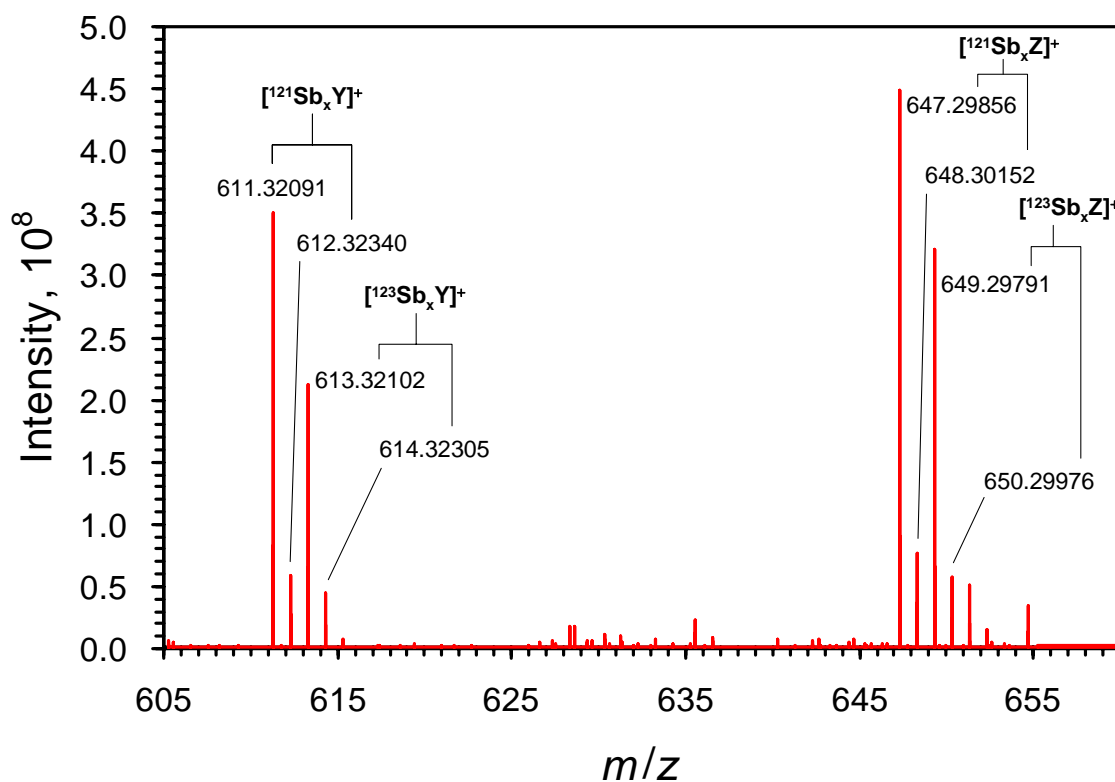

Figure S4. ESI-FTICR-MS spectrum of Sb-DT complexes.

## 5. TGA Data of Sb-DT Complex

Thermogravimetric analysis (TGA) was performed using a Seiko TG/DTA6200 to investigate the thermal decomposition behavior of the Sb-DT complex. 39.618 milligrams of the Sb-DT complex was placed in an aluminum pan, and this was then placed in the TGA instrument. The temperature was raised to 600 °C at a heating rate of 10 °C/min under a N<sub>2</sub> atmosphere (flow rate 200 mL/min). Figure S5 shows the resulting TG curve for the analysis of the Sb-DT complex.

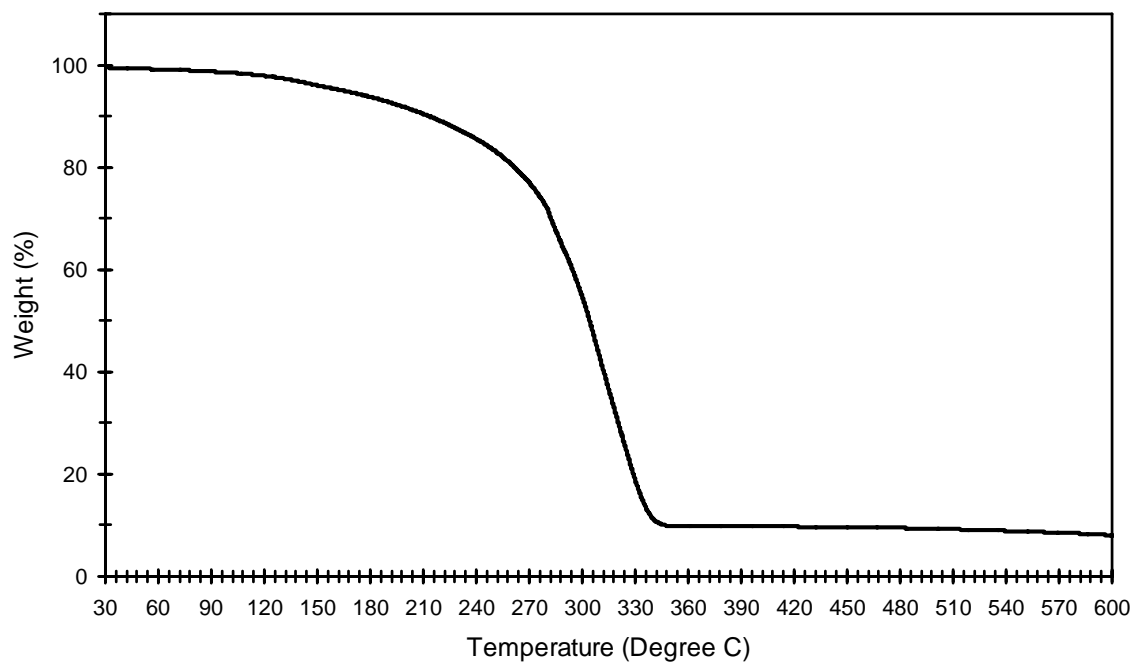

**Figure S5.** TG curve of Sb-DT complex.

## 6. HRTEM image of Bi<sub>70</sub>Sb<sub>30</sub> Alloy NPs

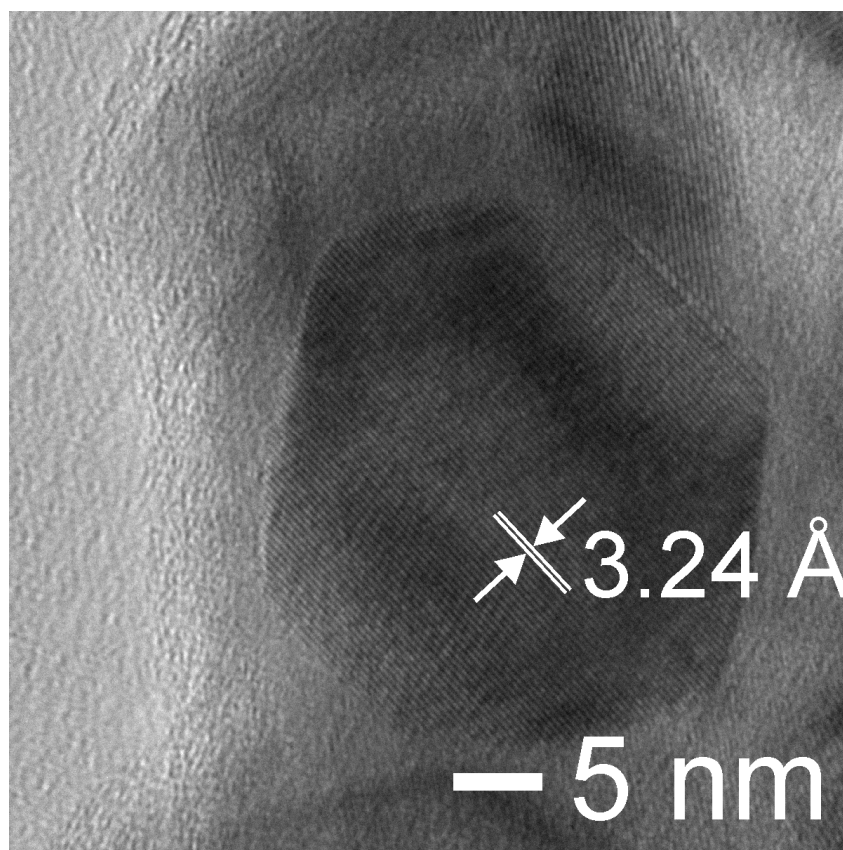

**Figure S6.** HRTEM image of a single Bi<sub>70</sub>Sb<sub>30</sub> NP synthesized using OAM as capping ligand. The lattice spacing measured is 3.24 Å which corresponds to the (012) crystal plane of Bi<sub>70</sub>Sb<sub>30</sub> alloy.

## 7. Relationship between Lattice Spacing and Composition of BiSb Alloy

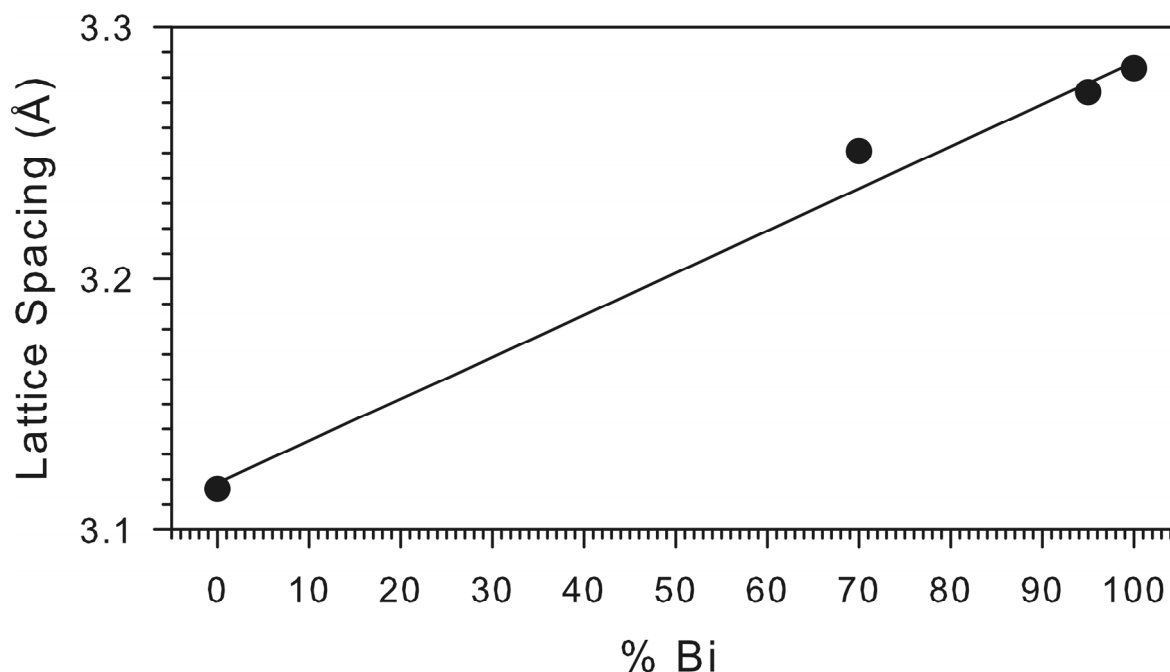

**Figure S7.** Relationship between the lattice spacing of (012) crystal plane and composition of BiSb alloy synthesized based on bimetallic approach using OAM ( $\text{Bi}_{70}\text{Sb}_{30}$ ) and OAC/OAM ( $\text{Bi}_{95}\text{Sb}_5$ ). The lattice distance of crystal plane (012) of pure Bi, Sb and BiSb alloy were calculated based on XRD peak positions of (012) crystal plane collected for the corresponding synthesized NPs. The Williamson-Hall plot analysis was also conducted to exclude the strain broadening contribution. As a result, it is found that the strain component is negligibly small ensuring that the Vegard's law can be quantitatively applied.

## 8. Comparison of XRD Peak Position Collected for Resulting NPs Synthesized using $\text{BiCl}_3$ and $\text{BiCl}_3/\text{SbCl}_3$ with DT as Capping Ligands

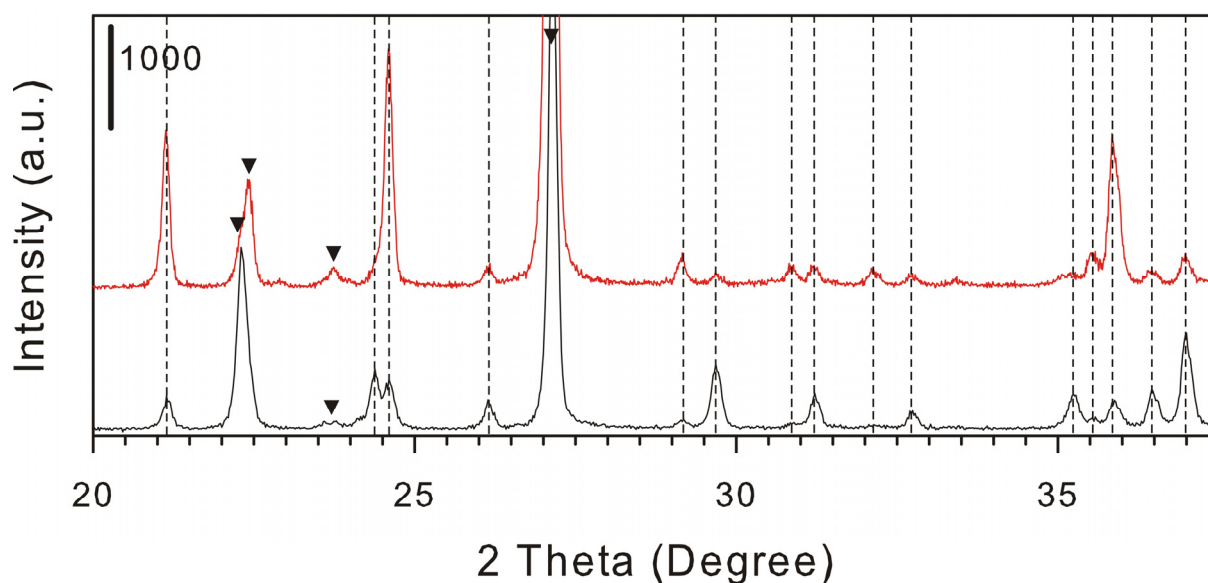

**Figure S8.** XRD patterns of NPs synthesized using DT and  $\text{BiCl}_3$  (red curve) and  $\text{BiCl}_3/\text{SbCl}_3$  (black curve) in range of 20 to 37.5 in two theta degree. The symbol (▼) was used to label for the peaks of Bi with rhombohedral structure. The unidentifiable peaks for these two NPs are found to have the same pattern. The dash lines were used to show the coincidence of the unidentifiable peak position of those two XRD patterns.

## 9. Bimetallic Synthesis of Bi-Te Halide Precursors and DT

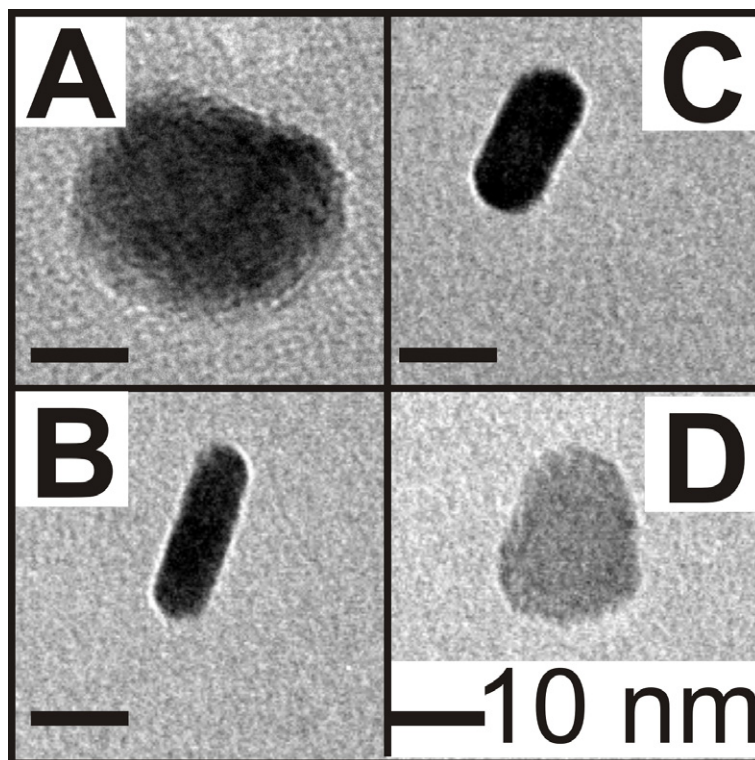

**Figure S9.** TEM images for NPs synthesized using Bi-Te halide precursors and DT as capping species. The images of individual NPs show the different contrast arising from the different alignment with electron beam in which (A and D) show the top down view and (B and C) show the side view of disc like NPs.

## 10. HRTEM Images of a Single Bi-Sb-Te NW Synthesized using OAM

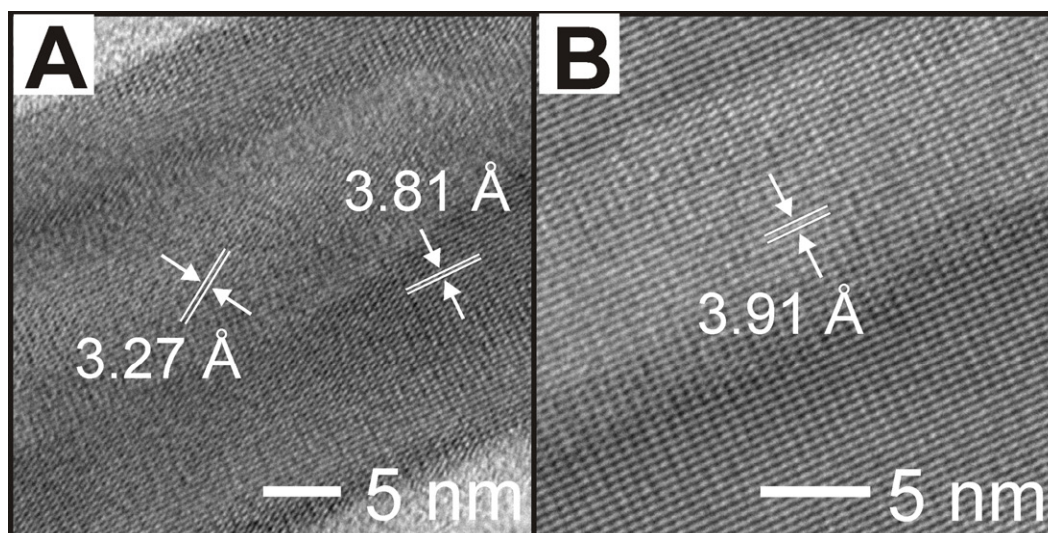

**Figure S10.** HRTEM images of different parts of a single Bi-Sb-Te NW synthesized using OAM.

## 11. Results for Trimetallic Approach using Oleic Acid as Capping System

The resulting NPs obtained for trimetallic synthesis using oleic acid as capping species shows NDs studded on NWs in the TEM images (Fig. S11). The XRD pattern collected for these materials shows the existence of several phases including Te, Bi<sub>2</sub>Te<sub>3</sub> and Sb<sub>2</sub>Te<sub>3</sub> (Fig. S12). The elemental analysis based on ICP-MS confirmed the composition of Bi<sub>11</sub>Sb<sub>23</sub>Te<sub>66</sub> which is consistent with the XRD results.

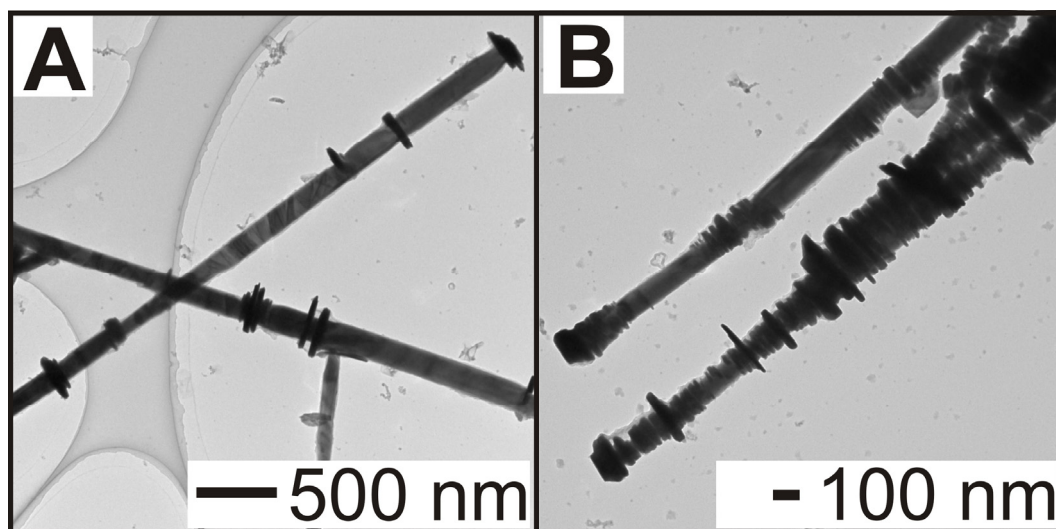

**Figure S11.** TEM images for NPs synthesized using three elemental precursors and OAC as capping species with 1:1 molar ratio between precursors and OAC.

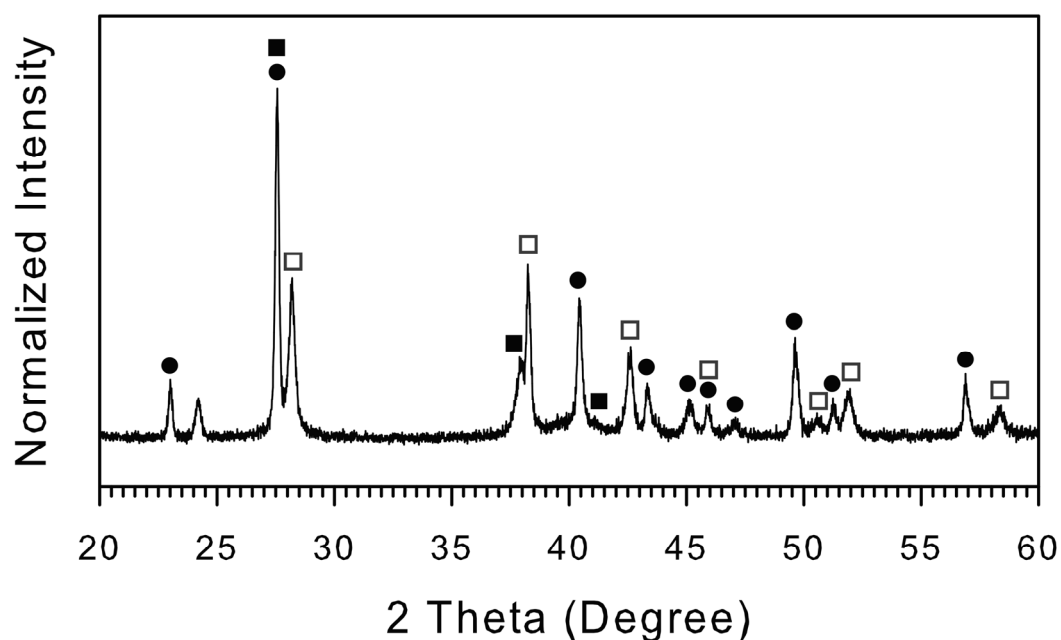

**Figure S12.** XRD pattern for resulting NPs synthesized using three elemental precursors and OAC as capping species with 1:1 molar ratio between precursors and OAC. The peak identities were label by symbol circle (●) for hexagonal Te, filled square (■) for rhombohedral Bi<sub>2</sub>Te<sub>3</sub> and open square (□) for rhombohedral Sb<sub>2</sub>Te<sub>3</sub>.

**Table S19.** XRD peak positions and corresponding crystal planes for Fig. S12 (BiSbTe-OAC system).

| <b>2 Theta (Degree)</b> | <b>Intensity</b> | <b>Phase</b>                                    | <b>(<i>h k l</i>)</b> |
|-------------------------|------------------|-------------------------------------------------|-----------------------|
| 23.01                   | Very weak        | Te (HEX)                                        | (1 0 0)               |
| 27.57                   | Strong           | Te (HEX), Bi <sub>2</sub> Te <sub>3</sub> (RHO) | (101), (015)          |
| 28.20                   | Medium           | Sb <sub>2</sub> Te <sub>3</sub> (RHO)           | (015)                 |
| 37.89                   | Weak             | Bi <sub>2</sub> Te <sub>3</sub> (RHO)           | (1010)                |
| 38.24                   | Medium           | Sb <sub>2</sub> Te <sub>3</sub> (RHO), Te(HEX)  | (1010), (102)         |
| 40.43                   | Medium           | Te (HEX)                                        | (110)                 |
| 41.03                   | Very weak        | Bi <sub>2</sub> Te <sub>3</sub> (RHO)           | (110)                 |
| 42.62                   | Weak             | Sb <sub>2</sub> Te <sub>3</sub> (RHO)           | (110)                 |
| 43.33                   | Weak             | Te (HEX)                                        | (111)                 |
| 45.26                   | Very weak        | Te (HEX)                                        | (003)                 |
| 45.86                   | Weak             | Te(HEX), Sb <sub>2</sub> Te <sub>3</sub> (RHO)  | (003), (1013)         |
| 47.03                   | Very weak        | Te (HEX)                                        | (200)                 |
| 49.63                   | Weak             | Te (HEX)                                        | (201)                 |
| 50.56                   | Very weak        | Sb <sub>2</sub> Te <sub>3</sub> (RHO)           | (119)                 |
| 51.19                   | Very weak        | Te (HEX)                                        | (112)                 |
| 51.97                   | Very weak        | Sb <sub>2</sub> Te <sub>3</sub> (RHO)           | (205)                 |
| 56.84                   | Weak             | Sb <sub>2</sub> Te <sub>3</sub> (RHO), Te (HEX) | (0117), (202)         |
| 58.35                   | Very weak        | Sb <sub>2</sub> Te <sub>3</sub> (RHO)           | (0210)                |

HEX=Hexagonal, RHO=Rhombohedral
